# Supplementary material for: Enhanced photocatalytic activity of nano WO3via thermal plasma treatment and porphyrin hybridization
Source: Royal Society of Chemistry journal article supplement (doi:10.1039/d5na01146a), 2026-05-18
Supplement: d5na01146a1.pdf [file d5na01146a1.pdf]

ARTICLE SUPPLEMENTARY

## Enhanced Photocatalytic Activity of nano WO<sub>3</sub> via Thermal Plasma Treatment and Porphyrin Hybridization

Xuan Huy Dao,<sup>†a</sup> Huu Khanh Vu,<sup>†b,c</sup> Thi Huyen Nguyen,<sup>c,d</sup> Minh Tan Man,<sup>c,d</sup> Thi Giang Nguyen,<sup>b,c</sup> Nhat Linh Nguyen,<sup>b</sup> Thanh Tung Nguyen,<sup>b,c</sup> Duc Duong La,<sup>e</sup> Cong Tu Nguyen<sup>a</sup> and Hoang Tung Nguyen<sup>\*b</sup>

a. Faculty of Engineering Physics, Hanoi University of Science and Technology, Hanoi, Vietnam. Email: tu.nguyencong@hust.edu.vn

b. Institute of Materials Science, Vietnam Academy of Science and Technology, Hanoi, Vietnam. Email: tungnh@ims.vast.ac.vn

c. Graduate University of Science and Technology, Vietnam Academy of Science and Technology, Hanoi, Vietnam.

d. Institute for Advanced Study in Technology, Ton Duc Thang University, Ho Chi Minh City, Vietnam.

e. Institute of Chemistry and Materials, Hanoi, Vietnam

\* Corresponding authors

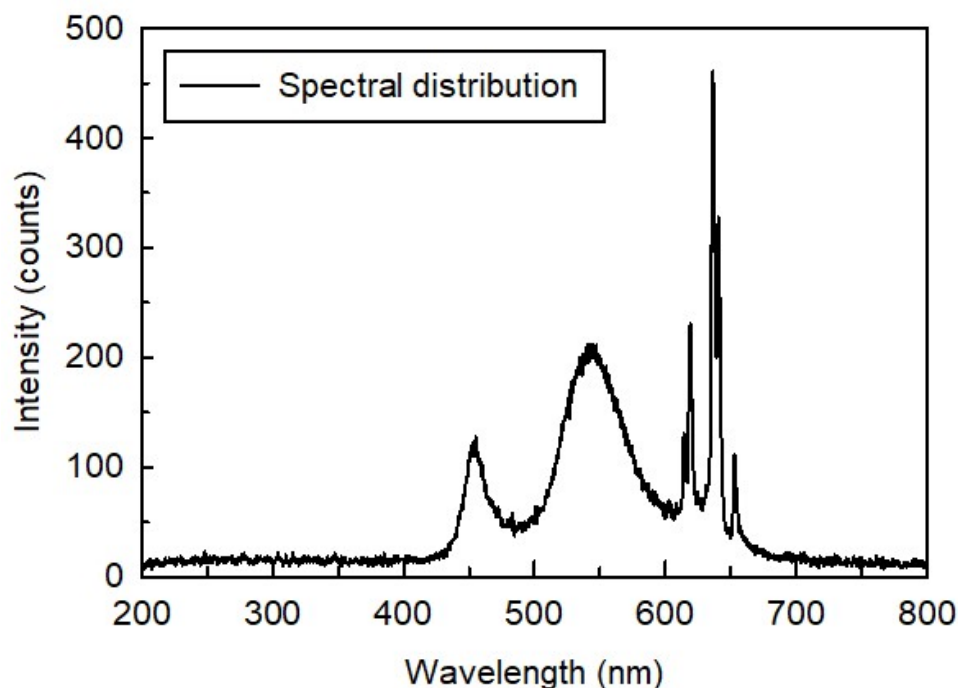

† The authors contributed equally.

Fig. S1: Spectral distribution of the light source

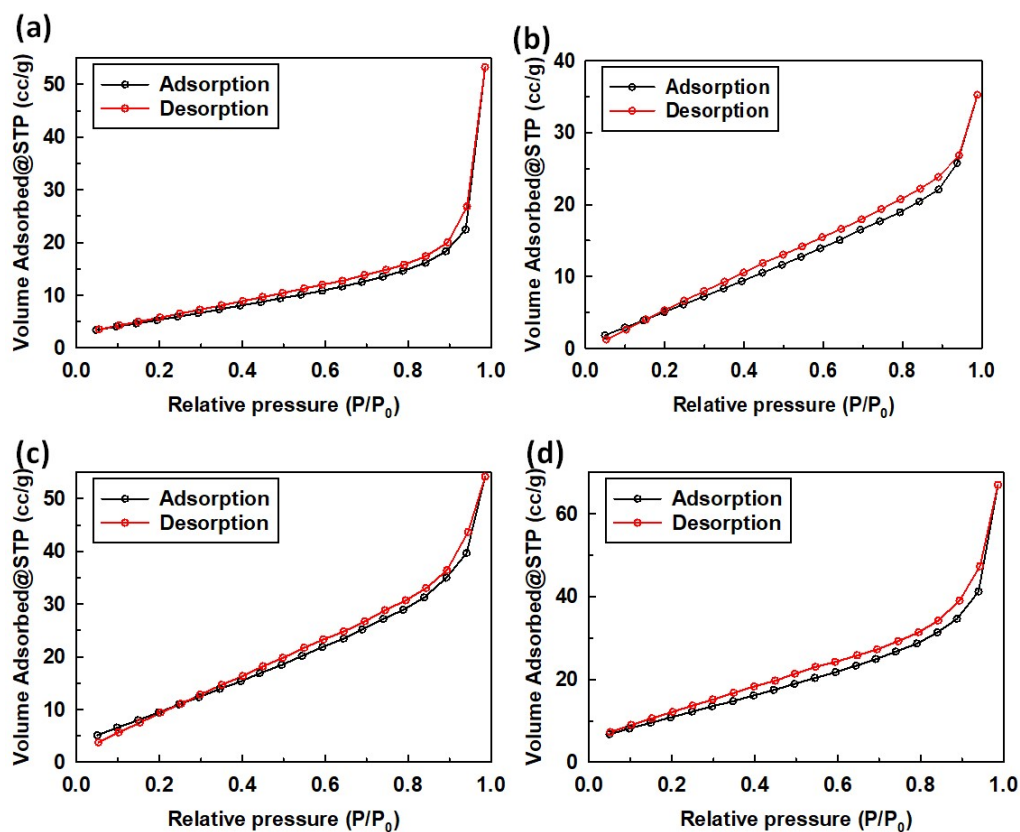

Fig. S2: Nitrogen adsorption–desorption isotherms of (a)  $\text{WO}_3 \cdot \text{H}_2\text{O}$  precursor, (b) P01, (c) P02, and (d) P03 measured at 77 K

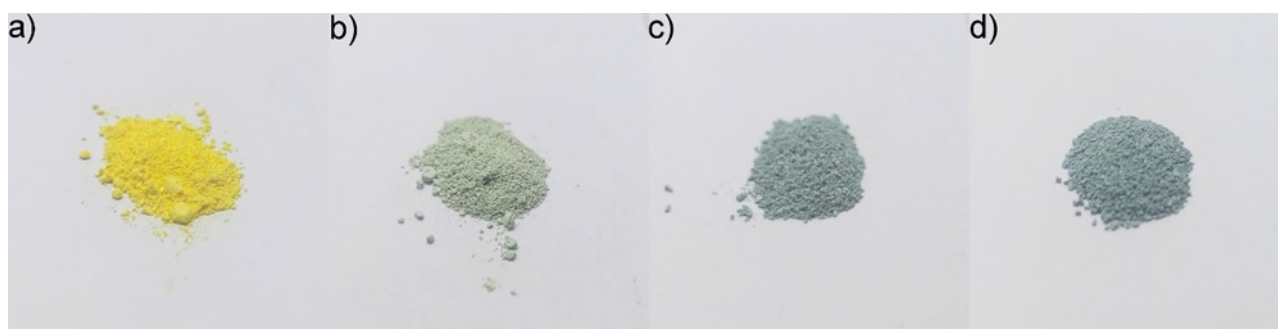

Fig. S3: Images of (a)  $\text{WO}_3 \cdot \text{H}_2\text{O}$ , (b) P01, (c) P02, and (d) P03

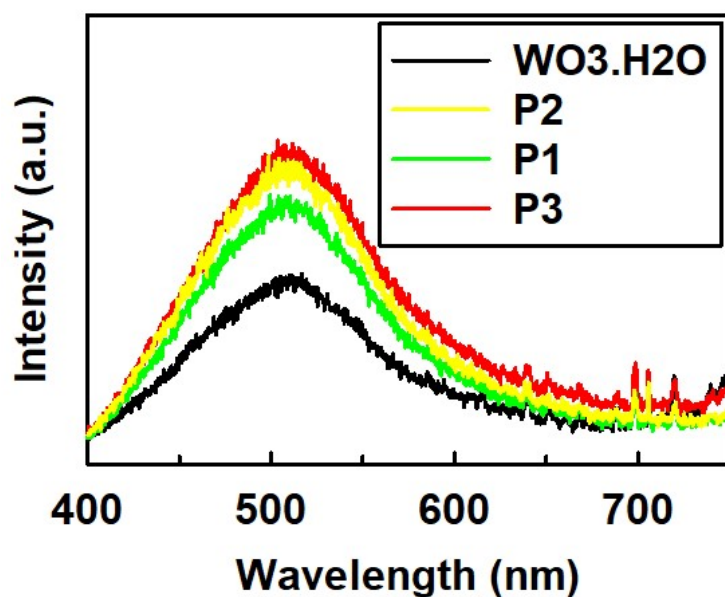

Fig. S4: PL emission spectra of  $\text{WO}_3 \cdot \text{H}_2\text{O}$  precursor and P01–P03 measured by laser 355 nm

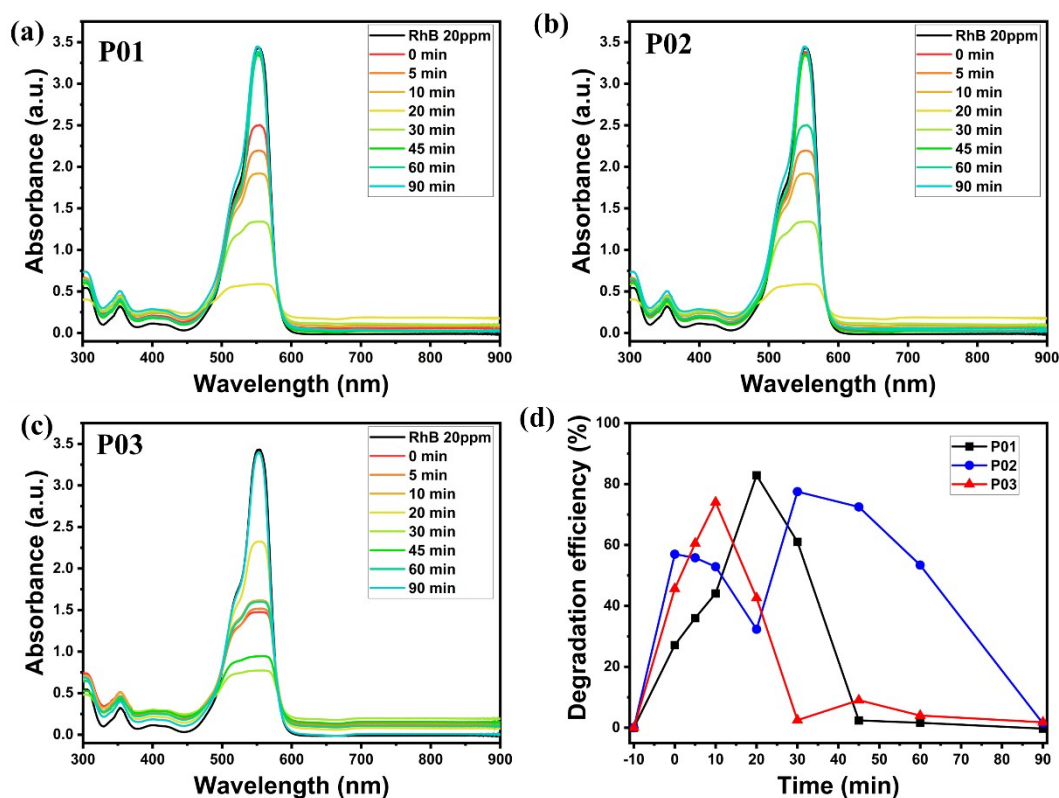

Fig. S5: Control experiments on plasma-treated  $\text{WO}_3$  without TCPP: UV-Vis absorption spectra of P01 (a), P02 (b), and P03 (c), and (d) degradation efficiency curves

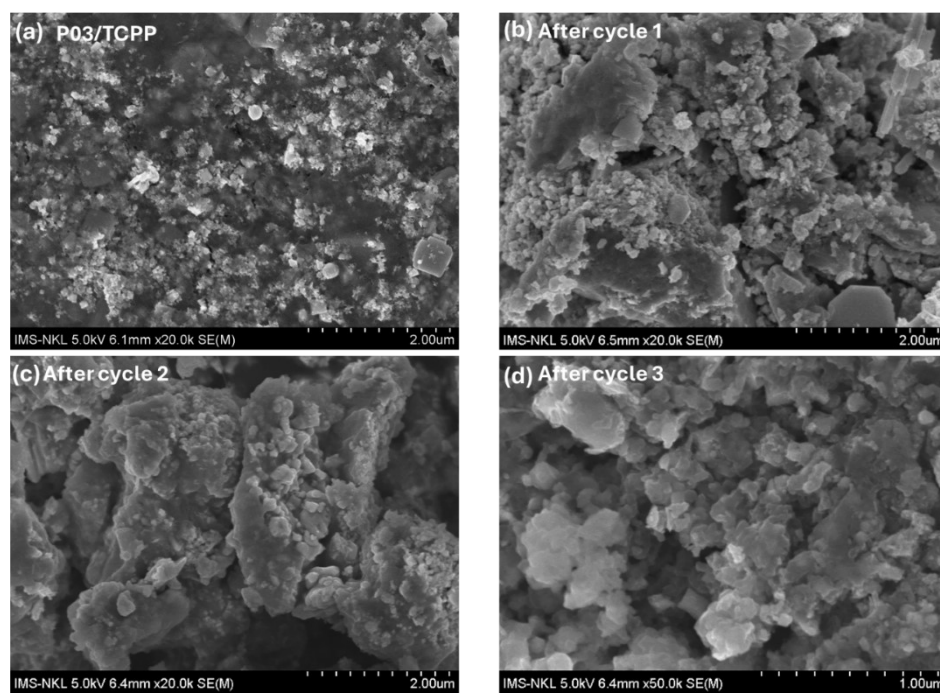

Fig. S6: SEM image of P03/TCPP after fabrication (a) and after photocatalysis cycle 1-3 (b-d)
